# Supplementary material for: How Indonesia’s Cities Are Grappling with Plastic Waste: An Integrated Approach towards Sustainable Plastic Waste Management
Source: MDPI journal article supplement (doi:10.3390/su16103921), 2024-05-08
Supplement: s1 [file s1]

*Article*

**How Indonesia's Cities are Grappling with Plastic Waste: An Integrated Approach Analysis towards Sustainable Plastic Waste Management**

**Yunisa Zahrah \*, Jeongsoo Yu \* and Xiaoyue Liu**

Graduate School of International Cultural Studies, Tohoku University, Sendai 980-8576, Japan

\* Correspondence: yunisa.zahrah.p6@dc.tohoku.ac.jp (Y.Z.); jeongsoo.yu.d7@tohoku.ac.jp (J.Y.)

## SUPPLEMENTARY MATERIALS

**Table S1.** MSW data in the case studies [based on the interviews and [1–4]]

| Type of data          | Bandung city                                    | Yogyakarta city                                | Magelang city                                   |
|-----------------------|-------------------------------------------------|------------------------------------------------|-------------------------------------------------|
| MSW generation        | 1600 ton/day                                    | 303 ton/day                                    | 81 ton/day                                      |
| MSW composition       | 45% organic, 17% plastic, 13% paper, 25% others | 46% organic, 31% plastic, 17% paper, 6% others | 34% organic, 22% plastic, 19% paper, 25% others |
| MSW contributors      | 60% H, 13% PF, 10% TM, 17% O                    | 64% H, 18% C, 9% TM, 9% O                      | 74% H, no available data on other sources       |
| Infrastructure        | TPS3R, waste bank, RDF facility, landfill*      | TPS3R, waste bank, landfill*                   | TPS3R, waste bank, landfill*                    |
| Waste collection rate | 80%                                             | 88%                                            | 75%                                             |
| Waste reduction rate  | 19%                                             | 25%                                            | 20%                                             |

H: household, C: commercial, PF: public facility, TM: traditional market, O: Others

\*All the three landfills are located outside the city, in the provincial area.

**Table S2.** List of interviews

| No. | Interview code | Interviewee                                                                    | Date          | Location   | Duration    |
|-----|----------------|--------------------------------------------------------------------------------|---------------|------------|-------------|
| 1   | GOV1           | Ministry of Environment and Forestry                                           | June 13, 2023 | Jakarta    | 75 minutes  |
| 2   | GOV2           | Department of Environment and Forestry of Yogyakarta Special Region Province 1 | July 05, 2023 | Yogyakarta | 75 minutes  |
| 3   | GOV3           | Department of Environment and Forestry of Yogyakarta Special Region Province 2 | July 05, 2023 | Yogyakarta |             |
| 4   | GOV4           | Team Acceleration of Priority Program of Yogyakarta Special Region Province    | June 04, 2023 | Yogyakarta | 75 minutes  |
| 5   | GOV5           | Department of Environment of Bandung City                                      | June 14, 2023 | Bandung    | 100 minutes |
| 6   | GOV6           | Department of Environment of Yogyakarta City                                   | June 26, 2023 | Yogyakarta | 75 minutes  |

|    |       |                                                            |               |            |             |
|----|-------|------------------------------------------------------------|---------------|------------|-------------|
| 7  | GOV7  | Department of Environment of Magelang City                 | June 09, 2023 | Magelang   | 150 minutes |
| 8  | GOV8  | Municipal Government of Yogyakarta City                    | Aug 11, 2023  | Yogyakarta | 60 minutes  |
| 9  | GOV9  | Waste Bank Forum of Yogyakarta City                        | June 24, 2023 | Yogyakarta | 60 minutes  |
| 10 | GOV10 | Temporary 3R Waste Collection Facility in Bandung          | June 16, 2023 | Bandung    | 30 minutes  |
| 11 | GOV11 | Temporary 3R Waste Collection Facility in Magelang         | June 27, 2023 | Magelang   | 20 minutes  |
| 12 | GOV12 | Temporary 3R Waste Collection Facility in Yogyakarta       | July 17, 2023 | Yogyakarta | 60 minutes  |
| 13 | WBC1  | Waste Bank Central of Bandung City 1                       | June 14, 2023 | Bandung    | 30 minutes  |
| 14 | WBC2  | Waste Bank Central of Bandung City 2                       | June 15, 2023 | Bandung    | 30 minutes  |
| 15 | WBC3  | Waste Bank Central of Magelang City                        | June 27, 2023 | Magelang   | 65 minutes  |
| 16 | WBU1  | Waste Bank Unit <i>Oh Darling</i>                          | June 15, 2023 | Bandung    | 60 minutes  |
| 17 | WBU2  | Waste Bank Unit <i>Dabaresih</i>                           | June 17, 2023 | Bandung    | 55 minutes  |
| 18 | WBU3  | Waste Bank Unit <i>Sembara</i>                             | June 17, 2023 | Bandung    | 35 minutes  |
| 19 | WBU4  | Waste Bank Unit <i>Bumi Inspirasi</i>                      | June 19, 2023 | Bandung    | 75 minutes  |
| 20 | WBU5  | Waste Bank Unit <i>Tigo Setunggal</i>                      | May 28, 2023  | Yogyakarta | 75 minutes  |
| 21 | WBU6  | Waste Bank Unit <i>Suryo Resik</i>                         | June 04, 2023 | Yogyakarta | 60 minutes  |
| 22 | WBU7  | Waste Bank Unit <i>Lintas Winongo</i>                      | June 24, 2023 | Yogyakarta | 40 minutes  |
| 23 | WBU8  | Waste Bank Unit <i>Gema Berseri</i>                        | June 26, 2023 | Yogyakarta | 60 minutes  |
| 24 | WBU9  | Waste Bank Unit <i>Sulolaras</i>                           | June 26, 2023 | Yogyakarta | 40 minutes  |
| 25 | WBU10 | Waste Bank Unit <i>Pelangi</i>                             | Aug 23, 2023  | Yogyakarta | 45 minutes  |
| 26 | WBU11 | Waste Bank Unit <i>Bumi Lestari</i>                        | Aug 25, 2023  | Yogyakarta | 45 minutes  |
| 27 | WBU12 | Waste Bank Unit <i>Nirwana</i>                             | July 30, 2023 | Magelang   | 55 minutes  |
| 28 | WBU13 | Waste Bank Unit <i>Bersemi</i>                             | July 30, 2023 | Magelang   | 60 minutes  |
| 29 | WBU14 | Waste Bank Unit <i>Rukun Makmur</i>                        | Aug 21, 2023  | Magelang   | 50 minutes  |
| 30 | WBU15 | Waste Bank Unit <i>Bougenville</i>                         | Aug 21, 2023  | Magelang   | 45 minutes  |
| 31 | WMC1  | Waste Management Company: <i>Daur Resik</i>                | June 01, 2023 | Online     | 75 minutes  |
| 32 | WMC2  | Waste Management Company: <i>Rapel</i> (officer 1)         | June 23, 2023 | Yogyakarta | 120 minutes |
| 33 | WMC3  | Waste Management Company: <i>Rapel</i> (officer 2)         | June 23, 2023 | Yogyakarta | 60 minutes  |
| 34 | WMC4  | Waste Management Company: <i>Rapel</i> 3 (waste collector) | June 20, 2023 | Yogyakarta | 20 minutes  |
| 35 | WMC5  | Waste Management Company: <i>Duitin</i>                    | Dec 01, 2023  | Online     | 60 minutes  |
| 36 | NGO1  | <i>Yaksa Pelestari Bumi Berkelanjutan</i> (YPBB)           | June 26, 2023 | Online     | 100 minutes |

|    |             |                                                           |               |                    |                           |
|----|-------------|-----------------------------------------------------------|---------------|--------------------|---------------------------|
| 37 | <b>NGO2</b> | Indonesia Packaging Recovery Organisation (IPRO) 1        | Aug 28, 2023  | Online             | 90 minutes                |
| 38 | <b>NGO3</b> | Indonesia Packaging Recovery Organisation (IPRO) 2        | Aug 28, 2023  | Online<br>Online   | 90 minutes<br>75 minutes  |
| 39 | <b>RC1</b>  | Indonesian Plastic Recycling Association ( <i>ADUPI</i> ) | Aug 10, 2023  | Online             | 90 minutes                |
| 40 | <b>RC2</b>  | Plastic Recycler ( <i>CV Bina Usaha Mandiri</i> )         | Aug 19, 2023  | Online<br>Boyolali | 75 minutes<br>165 minutes |
| 41 | <b>MM1</b>  | Middlemen 1                                               | June 06, 2023 | Yogyakarta         | 15 minutes                |
| 42 | <b>MM2</b>  | Middlemen 2                                               | June 07, 2023 | Yogyakarta         | 60 minutes                |
| 43 | <b>MM3</b>  | Middlemen 3                                               | July 30, 2023 | Magelang           | 30 minutes                |

Table S3 outlines the key actors in MSW management as identified in the case studies. It is important to note that while there are other significant actors in MSW management, such as the Department of Public Works and Housing responsible for infrastructure development, waste pickers, and itinerant waste buyers, however, the table focuses on those actors that will be explored more in this study.

**Table S3.** Key actors involved in MSW management within the case studies [based on the interviews, local regulations on MSW management, and [5]]

| Key actors                       | The roles                                                                                                                                                                |
|----------------------------------|--------------------------------------------------------------------------------------------------------------------------------------------------------------------------|
| Department of Environment        | Serves as the primary executor of MSW operations, including waste handling, service, and reduction efforts; educates the public; and develops the MSW system.            |
| TPS3R                            | Collects mixed-MSW, segregates it, processes organic waste, and transports inorganic waste to middlemen or recyclers.                                                    |
| Waste Bank Central               | Gathers recyclable waste from waste bank units, individuals, schools, offices, and businesses.                                                                           |
| Waste Bank Unit                  | Collects recyclable waste from the community in a neighborhood area.                                                                                                     |
| Private Waste Management Company | Represents the private sector in waste collection, focusing on recyclable materials, often utilizing digital platforms for efficiency.                                   |
| Middlemen/Dealers                | Operate in the private sector, formally or informally, purchasing waste from waste banks with minimum weight requirements, sorting the materials, and then selling them. |
| Recycling Industries             | Purchase sorted waste from middlemen/dealers/private waste management companies and process it for recycling.                                                            |

**Table S4.** Interview questions

| Interview question for municipal government                            |
|------------------------------------------------------------------------|
| 1. To what extent is the role of local government in waste management? |
| 2. Where does the budget for waste management in this city come from?  |

3. What are the local regulations regarding waste management?
4. What is the hierarchy of waste management in this city?
5. About the waste system components
  - What is the official procedure for handling household plastic waste?
  - What percentage of waste is sorted?
  - Do you think the plastic waste management system in this city is efficient?
  - What is the price range for waste management per household per month?
  - What percentage of household waste can be collected?
  - What are the types of resource management in this city? Why?
  - What percentage of waste goes to the landfill?
  - What type of landfill is currently in use? What are the future plans for the landfill?
6. Regarding the plastic waste processing & treatment system
  - What technology is used to process waste?
  - What is the recycling percentage in this city?
  - How is the development of EPR policy enforcement?
  - What is the situation of the recycling market in this city? Are the prices fluctuating?
7. Is there any waste management collaboration with external parties?
  - What are the current challenges in waste management between parties?
  - Are there efforts to integrate the informal sector into the waste management system?
  - What is the structure of waste bank in this city? How many WBUs are there?
8. What have been the impacts of waste management on the environment and public health so far?
9. How is the transformation of the waste system towards sustainable development?
  - What are the strengths and weaknesses of plastic waste management in this city?

#### **Interview question for national government**

1. What is the role of the MoEF in the waste management system?
2. What are the synergies and challenges of inter-agency cooperation in creating sustainable waste management?
3. Has the national budget been sufficient for waste management so far?
4. What is the hierarchy of policy implementation down to the city level?
5. How is the development of EPR in Indonesia?
6. What efforts have been or will be made by the central government to address plastic waste?
7. What is the plastic recycling rate in Indonesia currently?
8. In your opinion, is plastic waste management in Indonesia efficient? What are its strengths and weaknesses?
9. Could you explain about the waste bank initiative?
10. What infrastructure is currently being developed or will be developed?
11. What efforts are being made to integrate the informal sector into the formal sector?
12. What are the central government's strategies for creating an integrated and sustainable waste management system?

#### **Interview question for TPS3R**

1. Since when has the TPS3R been established?
2. What types of waste are accepted, and from where?
3. What is the process flow for plastic waste at TPS3R?
  - To where is plastic waste transferred, and into what does it get transformed?
4. How many kilograms of plastic waste are recovered per day?
  - Which type of plastic waste is collected the most?
5. Which types of plastic waste can be sorted and recycled, and what percentage is this?

|                                                                                                                                                                                                                                                                                                                                                                                                                                                                                                                                                                                                                                                                                                                                                                                                                                                                                                                                                                                                                                                                                                                                                                                                                                                                                                                                                                                                                                                                                                                                                                                                                                                                                                                                                                                                                                                       |
|-------------------------------------------------------------------------------------------------------------------------------------------------------------------------------------------------------------------------------------------------------------------------------------------------------------------------------------------------------------------------------------------------------------------------------------------------------------------------------------------------------------------------------------------------------------------------------------------------------------------------------------------------------------------------------------------------------------------------------------------------------------------------------------------------------------------------------------------------------------------------------------------------------------------------------------------------------------------------------------------------------------------------------------------------------------------------------------------------------------------------------------------------------------------------------------------------------------------------------------------------------------------------------------------------------------------------------------------------------------------------------------------------------------------------------------------------------------------------------------------------------------------------------------------------------------------------------------------------------------------------------------------------------------------------------------------------------------------------------------------------------------------------------------------------------------------------------------------------------|
| 6. Do you think that people are more inclined to sort waste now compared to the past? What challenges are faced in processing waste at TPS3R?                                                                                                                                                                                                                                                                                                                                                                                                                                                                                                                                                                                                                                                                                                                                                                                                                                                                                                                                                                                                                                                                                                                                                                                                                                                                                                                                                                                                                                                                                                                                                                                                                                                                                                         |
| <b>Interview question for waste bank</b>                                                                                                                                                                                                                                                                                                                                                                                                                                                                                                                                                                                                                                                                                                                                                                                                                                                                                                                                                                                                                                                                                                                                                                                                                                                                                                                                                                                                                                                                                                                                                                                                                                                                                                                                                                                                              |
| <ol style="list-style-type: none"> <li>1. When was the waste bank established? What activities are currently underway?</li> <li>2. How does the waste collection system work at this waste bank? Does the committee conduct further sorting?</li> <li>3. How many members does this waste bank have on an RT/RW scale? What percentage of households are members?</li> <li>4. What form of support does the local government provide to the waste bank?</li> <li>5. What type of plastic is most collected? What type of plastic is rejected?</li> <li>6. Is there any data on the amount and composition of waste from 2019 to 2023?</li> <li>7. Where does the income for the waste bank management come from?</li> <li>8. How do you deal with the fluctuation of plastic prices?</li> <li>9. What are the driving factors in managing the waste bank? Any challenges?</li> <li>10. In your opinion, what influences whether people choose to join or not join the waste bank?</li> <li>11. Are people willing to collect waste according to the regulations?</li> <li>12. What do you think about the plastic waste management system in this city? Any suggestions?</li> </ol>                                                                                                                                                                                                                                                                                                                                                                                                                                                                                                                                                                                                                                                                   |
| <b>Interview question for waste management company</b>                                                                                                                                                                                                                                                                                                                                                                                                                                                                                                                                                                                                                                                                                                                                                                                                                                                                                                                                                                                                                                                                                                                                                                                                                                                                                                                                                                                                                                                                                                                                                                                                                                                                                                                                                                                                |
| <ol style="list-style-type: none"> <li>1. About the company <ul style="list-style-type: none"> <li>• When was this company established, and what activities are currently being undertaken?</li> <li>• Where is it currently operating?</li> <li>• How many clients does the company have?</li> <li>• What digital solutions are used?</li> </ul> </li> <li>2. How is this company's relationship with the city or national government? <ul style="list-style-type: none"> <li>• Is the service provided by this company integrated with waste management in the formal sector?</li> </ul> </li> <li>3. What is the material recovery flow? Who are the stakeholders involved in the system?</li> <li>4. Regarding plastic waste, how many kilograms of plastic waste can be collected per day?</li> <li>5. What type of plastic is most collected?</li> <li>6. Of the plastic waste received, can all of it be recycled? What recycled products are produced?</li> <li>7. Of the collected plastic waste, what packaging is most difficult or impossible to recycle? How is this addressed? And what types of plastic packaging are already being recycled in large quantities?</li> <li>8. How does this company cope with the fluctuation of plastic prices?</li> <li>9. What drives the efforts to handle plastic waste? What are the challenges in current practices? <ul style="list-style-type: none"> <li>• If looking at the processes of collection, transfer, and treatment, have there been any challenges?</li> </ul> </li> <li>10. What is the current condition of plastic recycling in Indonesia? What are its advantages and disadvantages? What areas need improvement?</li> <li>11. Indonesia has a target of reducing waste by 30% by 2025, in your opinion, how does this affect the recycling business in Indonesia?</li> </ol> |
| <b>Interview question for NGO</b>                                                                                                                                                                                                                                                                                                                                                                                                                                                                                                                                                                                                                                                                                                                                                                                                                                                                                                                                                                                                                                                                                                                                                                                                                                                                                                                                                                                                                                                                                                                                                                                                                                                                                                                                                                                                                     |
| <p><b>For NGO1:</b></p> <ol style="list-style-type: none"> <li>1. What is the role of NGOs in the plastic waste management system in the city of Bandung/Indonesia? <ul style="list-style-type: none"> <li>• What are the challenges in coordinating among stakeholders in waste management?</li> <li>• Could you explain the zero waste cities program initiated by YPBB in Bandung City? Is there a conceptual scheme for it?</li> </ul> </li> <li>2. What is your opinion on the plastic waste management system in the city of Bandung/Indonesia? <ul style="list-style-type: none"> <li>• How is it developing towards an integrated and sustainable system?</li> <li>• In your opinion, what are the challenges of plastic waste management in Indonesia? What is lacking, and what needs need to be developed?</li> </ul> </li> </ol>                                                                                                                                                                                                                                                                                                                                                                                                                                                                                                                                                                                                                                                                                                                                                                                                                                                                                                                                                                                                          |

- Why do you think it is not easy to enforce waste separation regulations in Indonesia?
3. Regarding the government's target for the reduction and management of plastic waste, do you think this can be achieved? How has it progressed so far?

**For NGO2-3:**

1. What are the roles and responsibilities of IPRO in the recycling system in Indonesia?
2. What challenges has IPRO faced in its role as a 'mediator' in the recycling packaging chain?
3. What types of packaging are accepted?
4. Who are IPRO's partners in recycling packaging? How does IPRO select its partners?
5. How does the government support IPRO or the packaging recycling industry in general in Indonesia?
6. What is the current condition of plastic recycling? What are its advantages and disadvantages? What areas need improvement?
7. Of the packaging (especially plastic) produced by IPRO members, which packaging is the most difficult to recycle? How is this addressed?
8. Indonesia has a target to reduce waste by 30% by 2025; how does this affect the recycling business in Indonesia?

**Interview question for recycler**

**For RC1:**

1. What are the roles and responsibilities of ADUPI in the waste management system in Indonesia?
2. How is ADUPI's relationship with the national government?
3. What is the current state of plastic recycling? What are its advantages and disadvantages? What improvements are needed?
4. How does the government support the recycling industry in Indonesia?
5. Currently, which types of plastic can be recycled in large quantities in Indonesia? And which types of plastic are difficult or cannot be recycled?
6. What are the main issues with plastic waste in Indonesia?
7. Indonesia has a target of reducing waste by 30% by 2025; how does this affect the recycling business in Indonesia?

**For RC2:**

1. What is the role and responsibility of this business in plastic waste management?
2. Can you describe the business model? Who are the parties involved in the system?
3. How is the relationship with the city government? Is there support or conflict?
4. How do you handle the fluctuation of plastic prices?
5. Which areas does this business cover?
6. What is the flow of plastic waste?
7. What is the plastic recycling process?
8. In the processes of collection, transfer, and treatment, have there been any challenges so far?
9. What types of plastic waste are accepted and what will they be recycled into? Are there any specific products required to support the business?
10. So far, which plastics have been the most difficult to recycle, and which are easy and in high demand?
11. What are your expectations for the plastic waste management system in Indonesia? What kind of government support could assist recycling business operators?

**For both:**

In your opinion, what is the current strategy of the recycling system in Indonesia? What needs improvement?

**Interview question for middlemen**

1. What is the flow of plastic waste? Who are the parties involved?
2. Where do the sources of waste come from?
3. What areas do you cover?

4. What is your relationship with the local government?
5. How much plastic waste can you collect per day? What percentage can be recycled?
6. What type of plastic waste is most collected and what is rejected? What are the recycled products?
7. Compared to the past, are more people sorting waste now?

**Table S5.** Plastic waste recovered through waste banks in the case studies (tonnes per year)

| Bandung |       |       | Yogyakarta |      |      | Magelang |      |      |
|---------|-------|-------|------------|------|------|----------|------|------|
| Year    |       |       |            |      |      |          |      |      |
| 2020    | 2021  | 2022  | 2020       | 2021 | 2022 | 2020     | 2021 | 2022 |
| 703,2   | 568,9 | 939,1 | 1,8        | 1,8  | 2,2  | 7,4      | 10,8 | 11,6 |

**Table S6.** Types of plastic waste accepted in the waste banks

| No | Case Study Location | Type of Plastic Waste | Example of products                                                                                             |
|----|---------------------|-----------------------|-----------------------------------------------------------------------------------------------------------------|
| 1  | Bandung City        | Soft plastics         | plastic shopping bag, transparent plastic bag                                                                   |
|    |                     | Thick plastics        | shampoo bottle, cleaning product bottle, PET bottle cap, jerry can, gallon cap, beverage cups, plastic basket   |
|    |                     | Hard plastics         | plastic hose, drainage pipe, hard food containers, <u>styrofoam</u> , yakult bottle                             |
|    |                     | PET bottles           | beverage bottles                                                                                                |
|    |                     | Others                | gallon bottle, compact disk                                                                                     |
| 2  | Yogyakarta City     | Soft plastics         | plastic shopping bag, transparent plastic bag                                                                   |
|    |                     | Thick plastics        | shampoo bottle, cleaning product bottles, concrete mixing bucket, beverage cups, plastic basket, water dipper   |
|    |                     | Hard plastics         | Drainage pipe, plastic hose, rubber boots, hard food container, helmet, thermos                                 |
|    |                     | PET bottles           | Beverage bottles                                                                                                |
|    |                     | Others                | gallon bottle, compact disk                                                                                     |
| 3  | Magelang City       | Soft plastics         | plastic shopping bag, transparent plastic bag, <u>multilayer plastics packaging</u>                             |
|    |                     | Thick plastics        | shampoo bottle, cleaning product bottle, PET bottle cap, beverage cups, plastic basket, jerry can, water dipper |
|    |                     | Hard plastics         | drainage pipe, yakult bottle, plastic toys                                                                      |
|    |                     | PET bottles           | beverage bottles                                                                                                |
|    |                     | Others                | gallon bottle, compact disk                                                                                     |

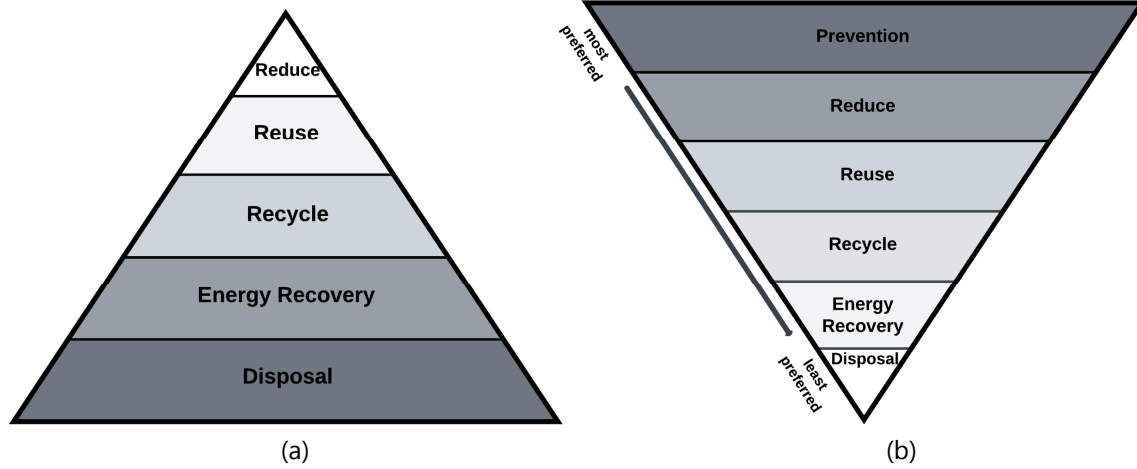

**Figure S1.** Common practice of waste management in developing countries (a), and the waste management hierarchy towards sustainable development (b) [6]

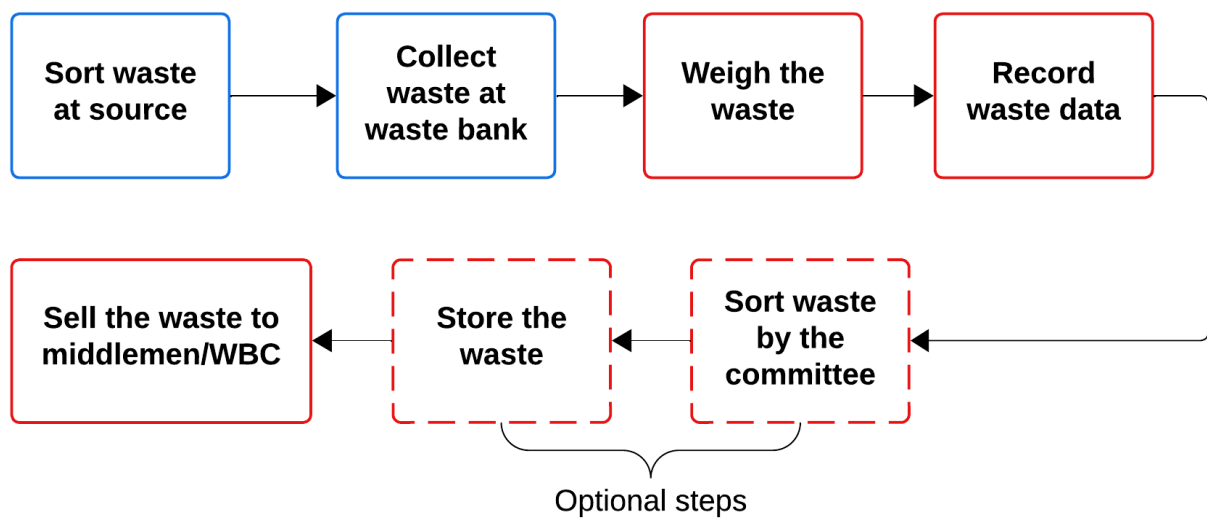

**Figure S2.** The waste collection process at WBU in the case studies. The blue color indicates the role of the community, while the red color denotes the role of WBU.

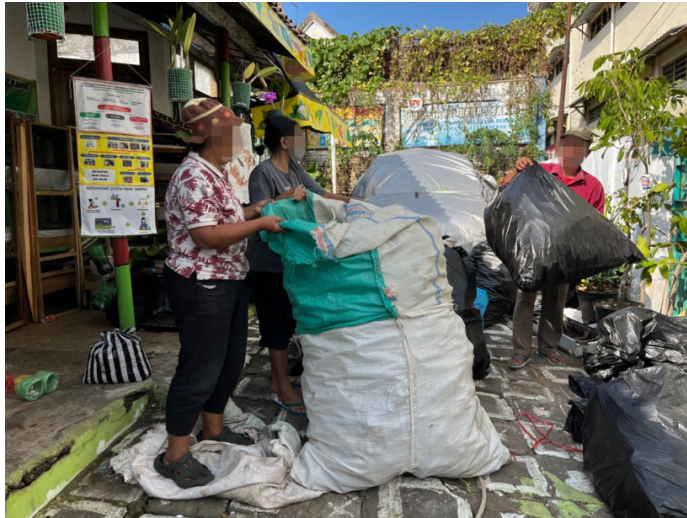

(a)

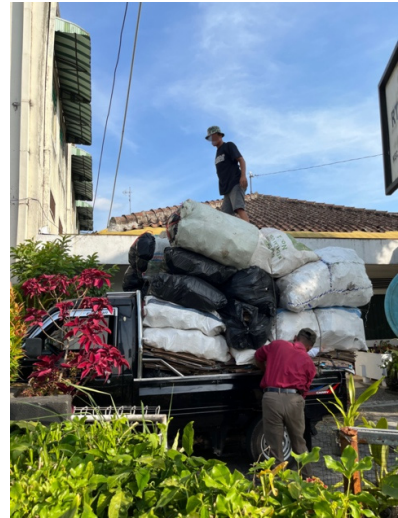

(b)

**Figure S3.** Plastic wastes collected at Bersemi waste bank in Magelang City (a), a middleman picked up the waste from a WBU (b) (own photograph, 2023)

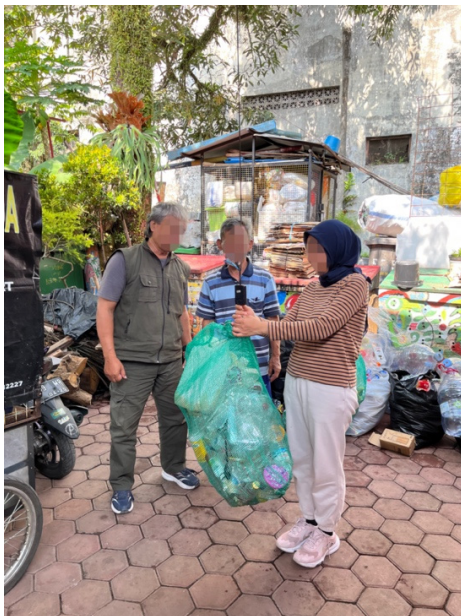

(a)

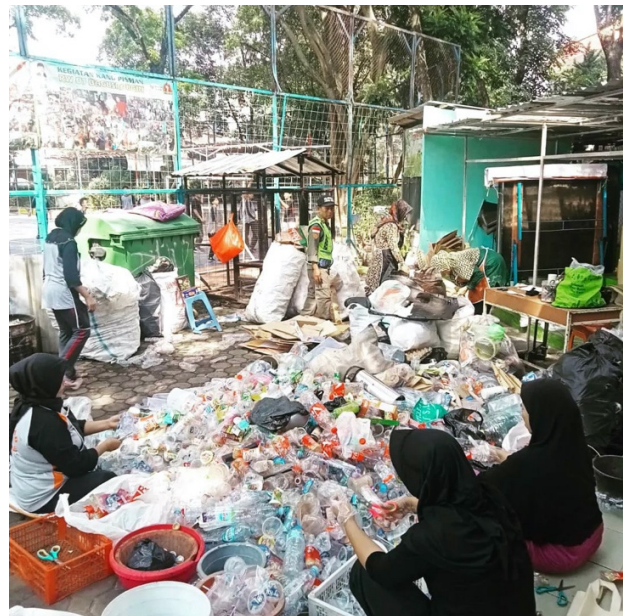

(b)

**Figure S4.** Weighing the plastic waste in Oh Darling WBU (a), the waste bank committee sort and clean the plastic waste in Sembara WBU (b) (own photograph 2023; Sembara waste bank photograph, 2023)

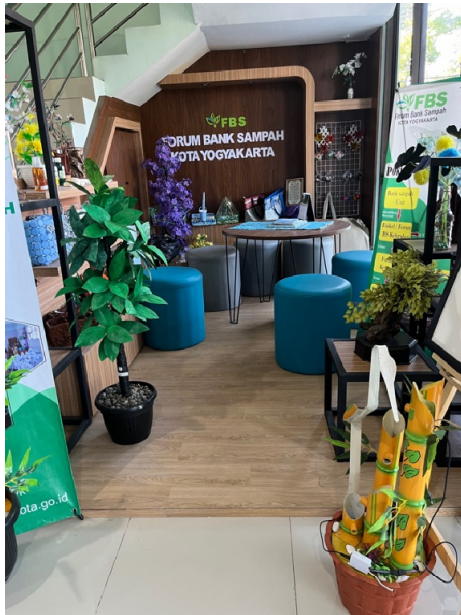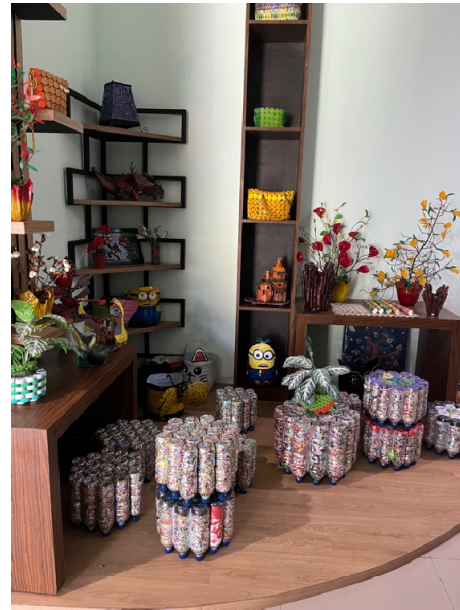

**Figure S5.** The corner to promote handicrafts by local waste banks inside the DoE of Yogyakarta City (own photograph, 2023)

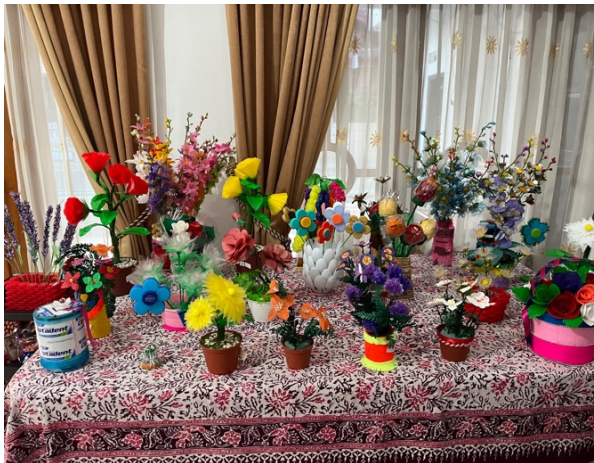

(a)

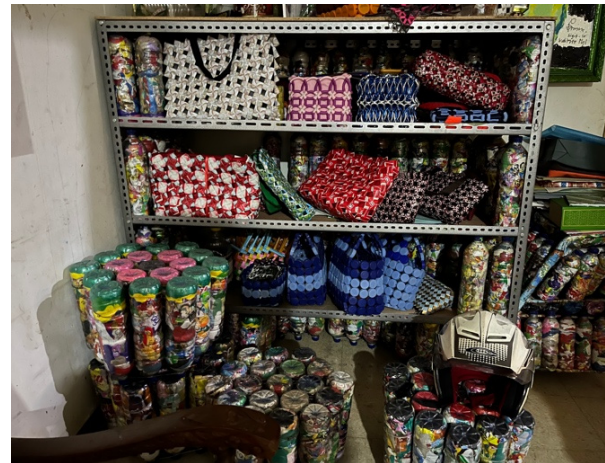

(b)

**Figure S6.** Handicrafts by local waste banks in Yogyakarta (a) and in Magelang (b) (own photograph, 2023)

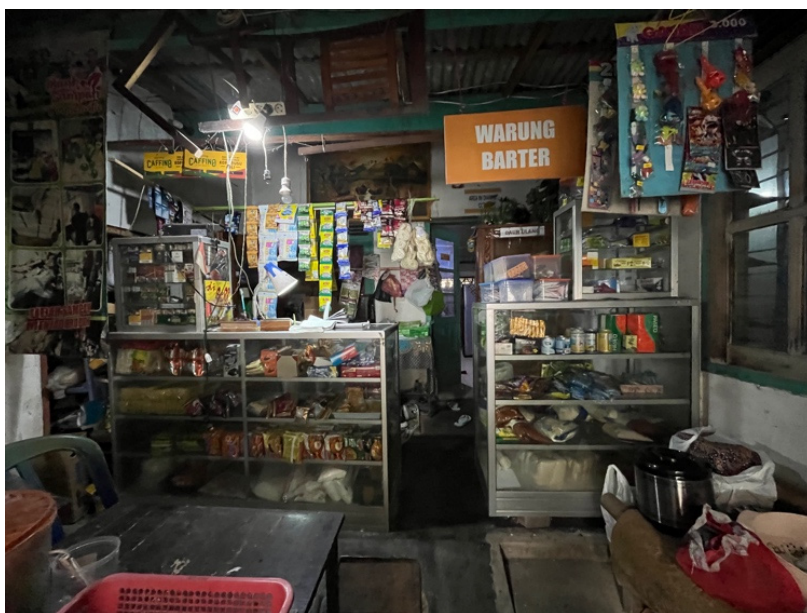

Figure S7. A grocery stall in Bougenville waste bank in Magelang City (own photograph, 2023)

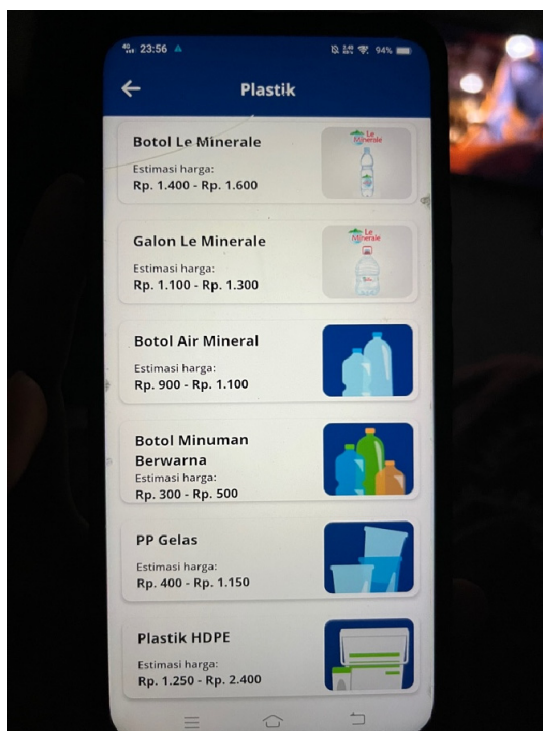

Figure S8. The Rapel waste management mobile apps (own photograph, 2023)

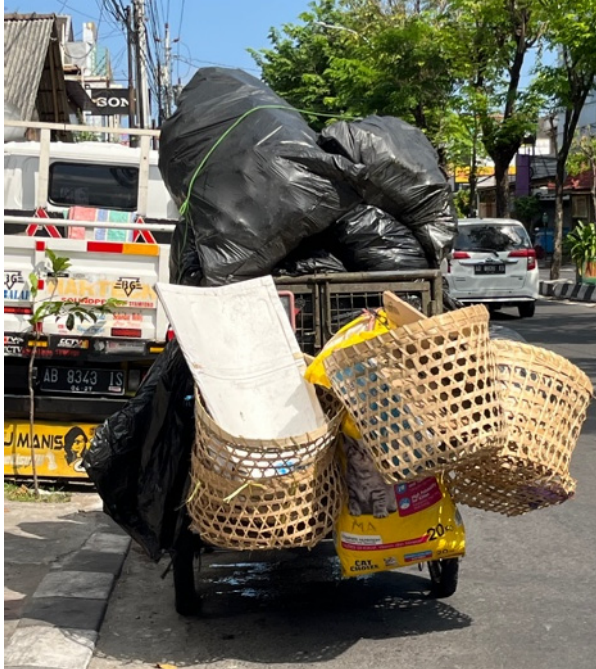

(a)

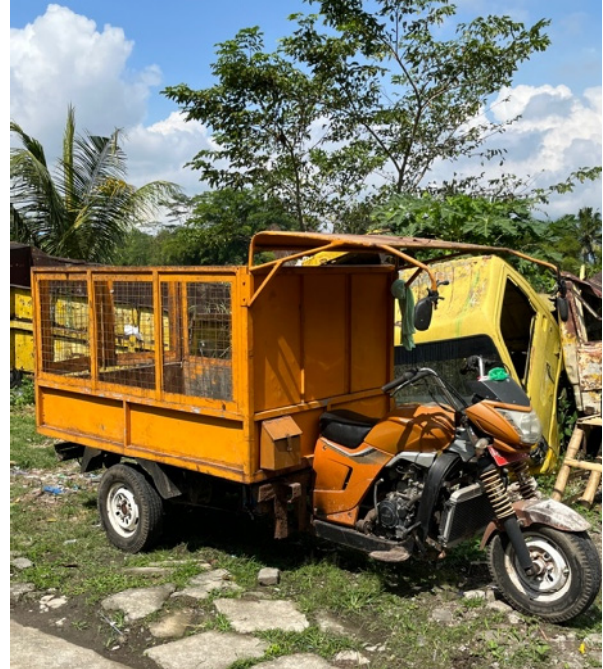

(b)

**Figure S9.** A pushcart (a) and three-wheel vehicles (b) to transfer waste from households (own photograph, 2023)

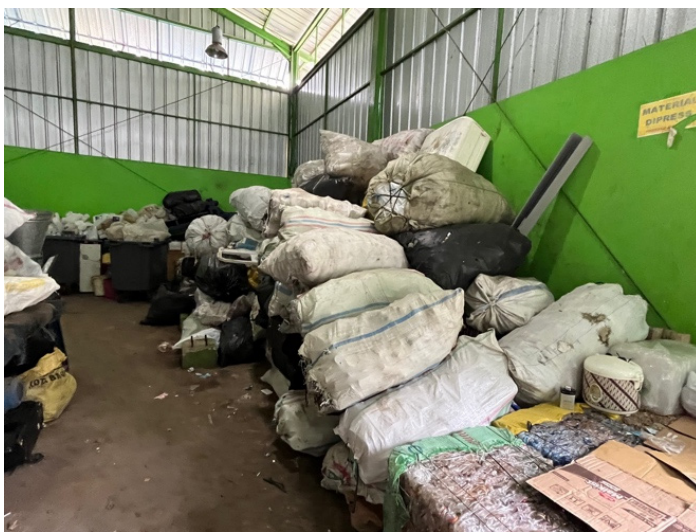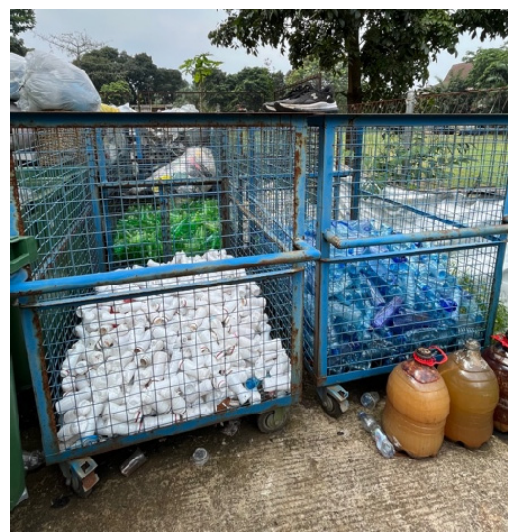

**Figure S10.** PDU Cicabe to sort and store plastic waste in Bandung City (own photograph, 2023)

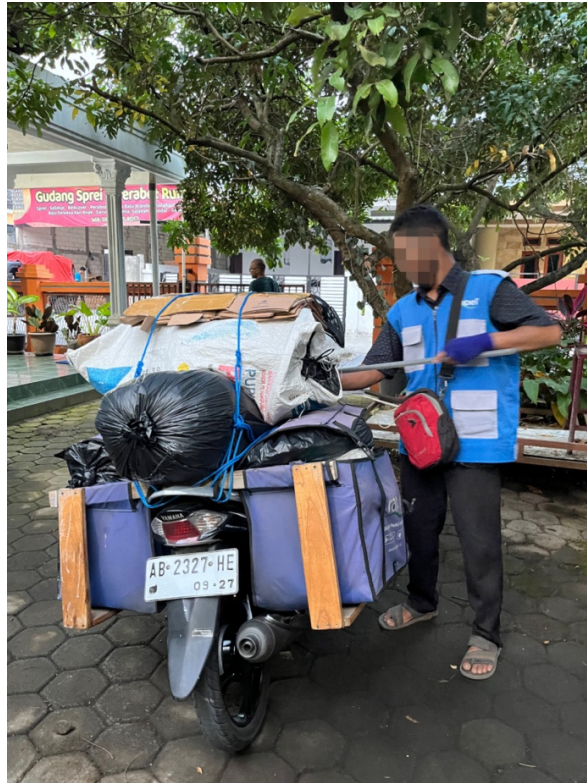

**Figure S11.** Waste collection by Rapel (own photograph, 2023)

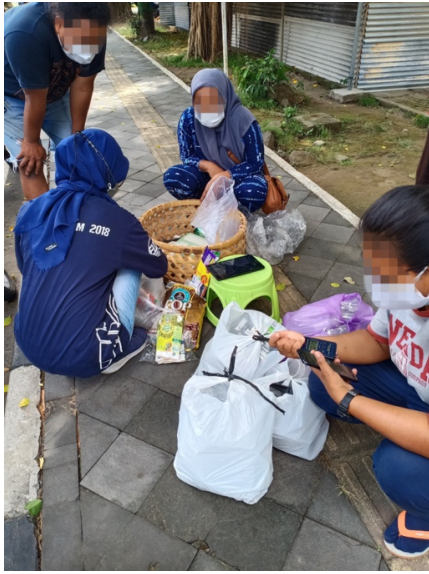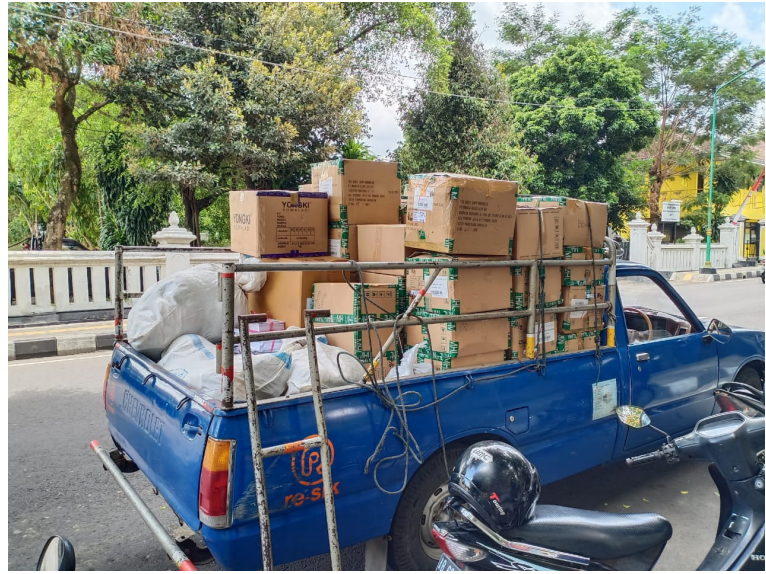

**Figure S12.** Waste collection by Daur Resik (own photograph, 2022)

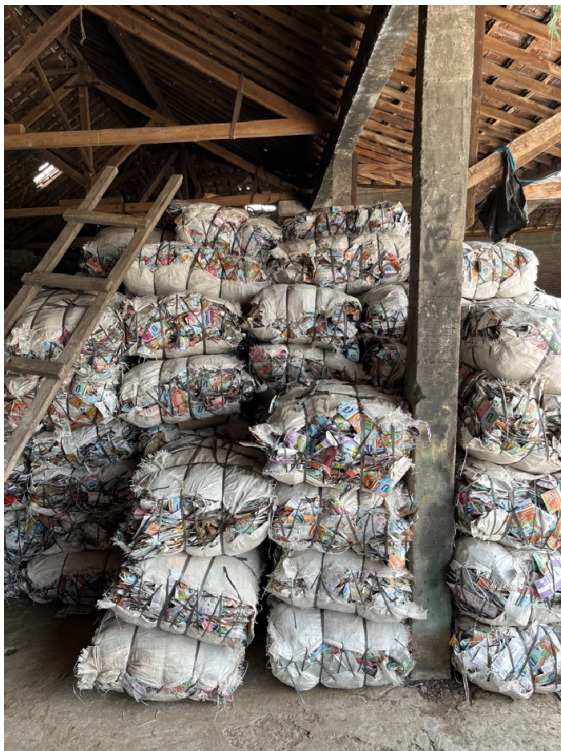

(a)

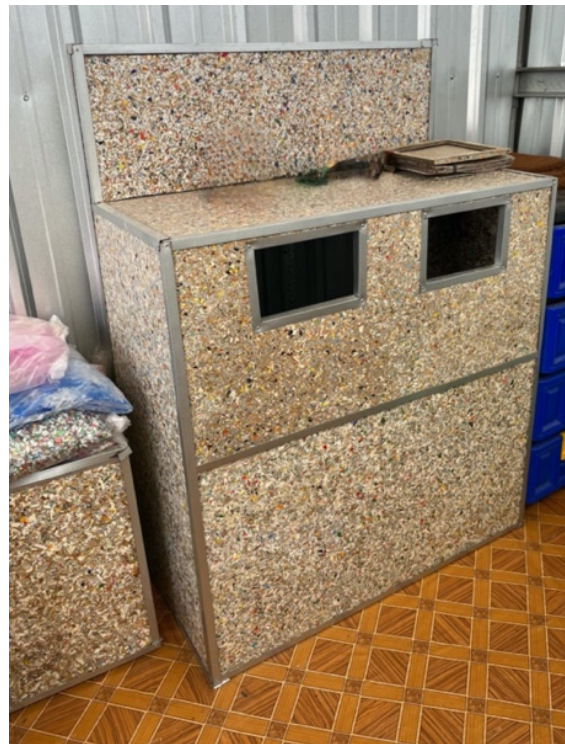

(b)

**Figure S13.** The pile of multilayer plastic packaging waste (a) and a recycled-product of multilayer plastic waste (b) in CV Bina Usaha Mandiri in Boyolali, Central Java (own photograph, 2023)

|                                |                                                                                                                                                                                                                                                                                                                                                                                                                                                                                                                                                                                                                                                                                                                                                                                                                                                                                                                                                                                                                                                                                                                                                                                                                                                           |                                                               |
|--------------------------------|-----------------------------------------------------------------------------------------------------------------------------------------------------------------------------------------------------------------------------------------------------------------------------------------------------------------------------------------------------------------------------------------------------------------------------------------------------------------------------------------------------------------------------------------------------------------------------------------------------------------------------------------------------------------------------------------------------------------------------------------------------------------------------------------------------------------------------------------------------------------------------------------------------------------------------------------------------------------------------------------------------------------------------------------------------------------------------------------------------------------------------------------------------------------------------------------------------------------------------------------------------------|---------------------------------------------------------------|
| <b>National law</b>            | Act No. 18/2008 on Solid Waste Management                                                                                                                                                                                                                                                                                                                                                                                                                                                                                                                                                                                                                                                                                                                                                                                                                                                                                                                                                                                                                                                                                                                                                                                                                 |                                                               |
| <b>Government Regulation</b>   | Government Regulation No. 81/2012 on Management of Household and Household-like Waste                                                                                                                                                                                                                                                                                                                                                                                                                                                                                                                                                                                                                                                                                                                                                                                                                                                                                                                                                                                                                                                                                                                                                                     |                                                               |
| <b>Presidential Regulation</b> | Presidential Regulation No. 97/2017 on National Policy and Management Strategy of Household Waste and Household-like Waste (JAKSTRANAS)                                                                                                                                                                                                                                                                                                                                                                                                                                                                                                                                                                                                                                                                                                                                                                                                                                                                                                                                                                                                                                                                                                                   |                                                               |
| <b>Ministerial Regulation</b>  | MoEF Regulation No. P.75/2019 on Roadmap to Waste Reduction by Producers                                                                                                                                                                                                                                                                                                                                                                                                                                                                                                                                                                                                                                                                                                                                                                                                                                                                                                                                                                                                                                                                                                                                                                                  | MoEF Regulation No. 14/2021 on Waste management in Waste Bank |
| <b>Local Regulation</b>        | <div> <div> <b>Bandung City</b> <div> <div>Local Regulation No. 17/2012 on Plastic Bag Reduction &amp; Mayor Regulation No. 37/2019 on the instruction of implementation of Local Regulation No. 17/2012</div> <div> <div>Local Regulation No. 9/2018 on Bandung City Waste Management</div> <div>Mayor Regulation No. 74/2021 on Bandung City Solid Waste Master Plan</div> </div> <div>Mayor Regulation No. 1426/2018 on Bandung City Policy and Strategy of Household Waste and Household-like Waste (JAKSTRADA)</div> </div> </div> <div> <b>Yogyakarta City</b> <div> <div>Local Regulation No. 10/2012 &amp; No. 1/2022 on Yogyakarta City Waste Management</div> <div>Mayor Regulation No. 32/2022 on Yogyakarta City Solid Waste Master Plan</div> </div> <div>Mayor Regulation No. 67/2018 on Yogyakarta City Policy and Strategy of Household Waste and Household-like Waste (JAKSTRADA)</div> </div> </div> <div> <b>Magelang City</b> <div> <div>Local Regulation No. 10/2013 on Magelang City Waste Management</div> <div>Mayor Regulation No. 06/2022 on "Magelang Cantik" Program</div> </div> <div>Mayor Regulation No. 30/2019 on Magelang City Policy and Strategy of Household Waste and Household-like Waste (JAKSTRADA)</div> </div> |                                                               |

**Figure S14.** Summary of Regulation of MSW (Adapted from [7], modified by the author)

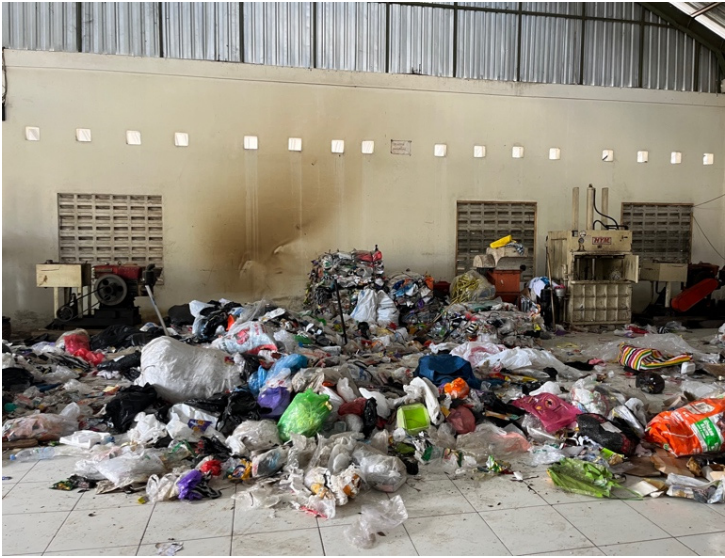

(a)

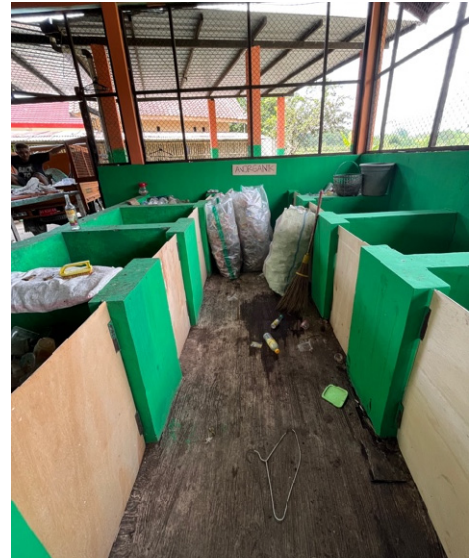

(b)

**Figure S15.** Mixed plastic waste in a TPS3R in Yogyakarta (a), and divided bins in a TPS3R in Magelang City (b) (own photograph, 2023)

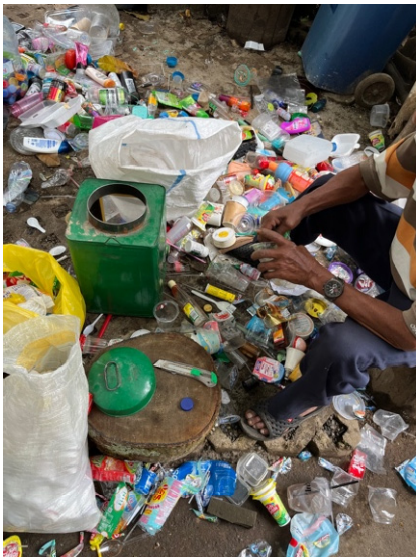

(a)

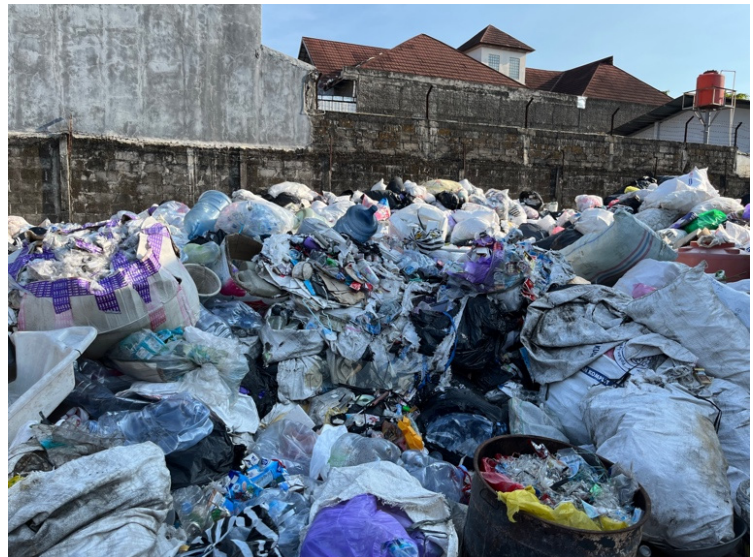

(b)

**Figure S16.** Plastic waste cleaning and sorting activities at a waste bank (a) and open space storage at a private waste management company (b) (own photograph, 2023)

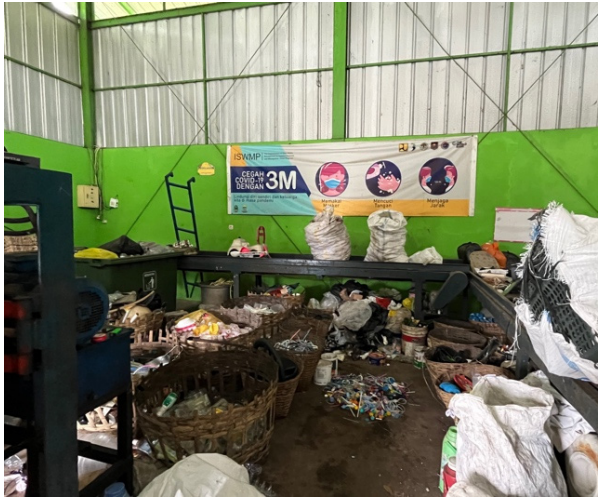

(a)

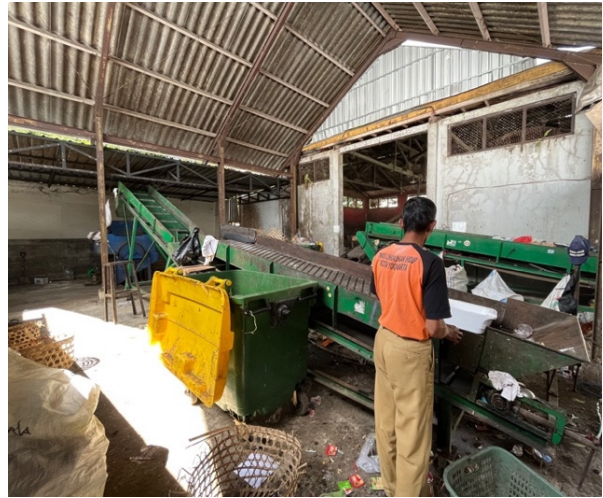

(b)

**Figure S17.** The underused sorting facilities in PDU Bandung City (a) and the conveyor belt facilities in TPS3R Yogyakarta City (b)

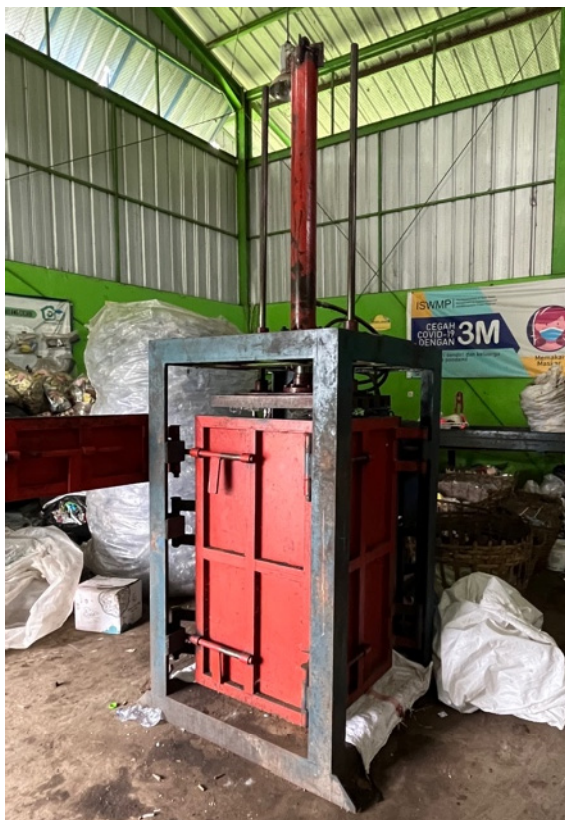

(a)

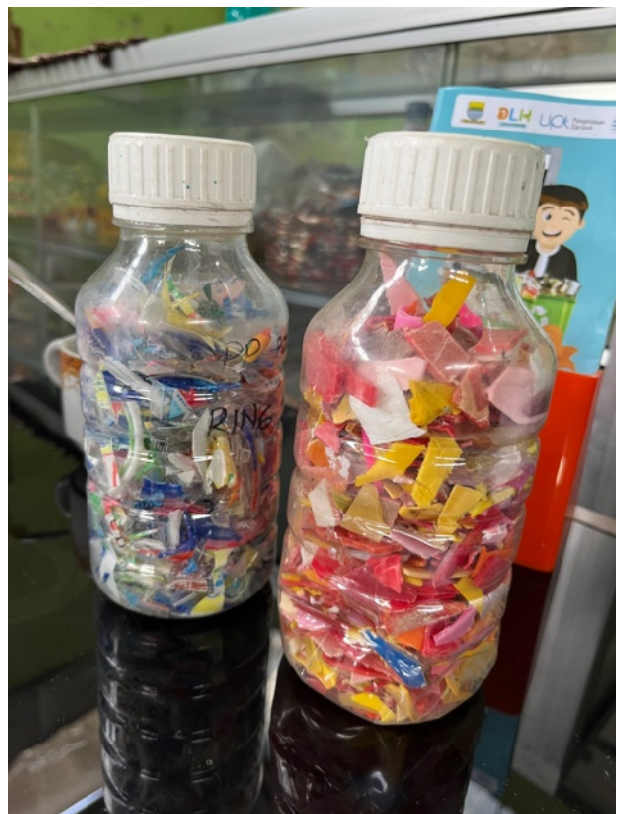

(b)

**Figure S18.** The compressing machine for PET bottles in PDU Bandung City (a) and shredded plastic waste product in WBC Bandung City (b)

## References

1. Department of Environment of Bandung City: Laporan Kinerja Instansi Pemerintah DLH Kota Bandung 2022. (2022)
2. Department of Environment of Magelang City: Neraca Sampah Kota Magelang 2022. (2022)
3. Jatmika, B., Sekito, T., Dote, Y., Subanu, L.P.: Community-Based Waste Management in Magelang Municipality Indonesia. (2016)
4. Ministry of Environment and Forestry of Indonesia: Waste Composition in Indonesia, <https://sipsn.menlhk.go.id/sipsn/public/data/komposisi>
5. Lestari, A.P., Bijaksana, A.F., Ibrahim, R.M.: The Governance of Solid Waste Institutions in Indonesia, <https://waste4change.com/research/the-governance-of-solid-waste-institutions-in-indonesia-part-ii-regional-government?lang=en>, (2019)
6. Pariatamby, A., Fauziah, S.H.: Sustainable 3R Practice in the Asia and Pacific Regions: The Challenges and Issues. In: Pariatamby, A. and Tanaka, M. (eds.) *Municipal Solid Waste Management in Asia and the Pacific Islands: Challenges and Strategic Solutions*. pp. 15–40. Springer Singapore, Singapore (2014)
7. Ministry of Environment and Forestry of Indonesia: National Plastic Waste Reduction Strategic Actions for Indonesia, <https://www.unep.org/ietc/resources/policy-and-strategy/national-plastic-waste-reduction-strategic-actions-indonesia>, (2020)
